# Supplementary material
Source: Springer Nature journal article supplement (https://www.springermedizin.de/resource/supplementary/12935_2013_394_MOESM2_ESM.pdf/9540522)

**A****Kasumi-1**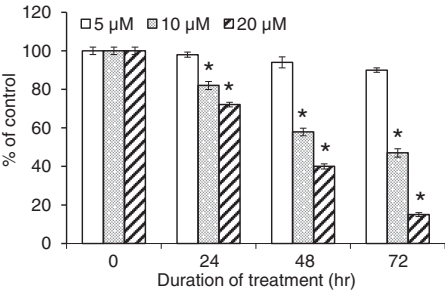**B****MV4-11**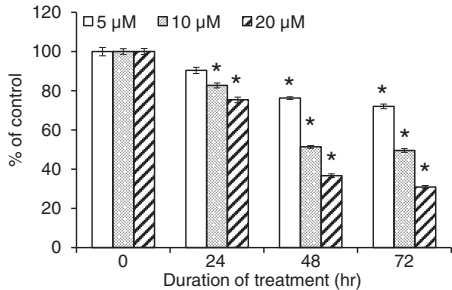

Supplement: MOESM2 [file 9540522]
